# Supplementary material for: Effects of an intervention for fear of progression in childhood cancer patients and their parents: results of a randomized clinical trial
Source: Research Square preprint supplement (doi:10.21203/rs.3.rs-4501631/v2), 2024-08-15
Supplement: Supplementary file 1 [file 1418d70c8b2c681b2613c161.docx]

Appendix.

Assumptions for a multiple regression analysis

(1) Residuals were normally distributed, as assessed by the visual exploration of the standardized residual’s histogram as well as Shapiro-Wilk test (W=0.932, p=.069).

(2) Residuals were homoscedastic, as assessed by exploration of scatterplots of the standardized predicted values and the studentized residuals as well as the Breusch-Pagan Test (BP=3.892, df=3, p=.273)

(3) Exploration of scatterplots indicated linear associations between the independent variables and the dependent variable.

(4) There was no evidence for multicollinearity, as assessed by the variance inflation factor, which is < 2 for all predictors.

(5) Residuals were not correlated, as assessed by visual exploration of the residuals vs. fitted diagram and Durbin-Watson test (DW=1.702, p=.189).

(6) Outlier diagnostics detected one outlier with Cook’s Distance 0.260 but it was a plausible case and did not change the significance of the results.

| Table 3: Influencing Variables, criterium parental FoP post (RQ 3) | | | |
| --- | --- | --- | --- |
| Predictor | B | SE B | *t* (*p*) |
| (Constant) | -0.133 | 0.105 | -1.263 (.219) |
| parental FoP pre | 0.888 | 0.115 | 7.735 (<.001) |
| time since diagnosis | -0.530 | 0.119 | - 4.444 (<.001) |
| age of the child | 0.176 | 0.119 | 1.483 (.151) |
| Note: R² = .752, adj. R² = .720, F (3,23) = 23.29; p<.001 | | |  |
