# Supplementary material for: Effects of an intervention for fear of progression in childhood cancer patients and their parents: results of a randomized clinical trial
Source: Research Square preprint supplement (doi:10.21203/rs.3.rs-4501631/v2), 2024-08-15
Supplement: Supplementary file 2 [file 60377072aef961bb67c43d69.xlsx]

## Sheet: Tabelle1
Table 3: Influencing Variables, criterium parental FoP post (RQ 3)
Predictor	B	SE B	t (p)
(Constant)	-0.112	0.124	-0.904 (.375)
parental FoP pre	0.812	0.134	6.052 (<.001)
time since diagnosis	-0.447	0.138	- 3.230 (.004)
age of the child	0.069	0.137	0.504 (.619)
Note: R² = .642, adj. R² = .598, F (3,24) = 14.37; p<.001
