# Supplementary material for: Effects of an intervention for fear of progression in childhood cancer patients and their parents: results of a randomized clinical trial
Source: Research Square preprint supplement (doi:10.21203/rs.3.rs-4501631/v2), 2024-08-15
Supplement: Supplementary file 3 [file 80836ea79d0bc52ff5649687.xlsx]

## Sheet: Tabelle1
Table 2: Content of the KIPA modules (8 sessions à 60-90 minutes)
Psycho-	Expanding knowledge about anxiety and FoP in particular by:
education	• refelcting common anxiety effects and how they are experienced physically
(family dyad)	• reflecting functional aspects of FoP and signs of dysfunctional FoP
	• reflecting existing ideas and different styles of coping with FoP
	A special comic supports the psychoeducation with a focus on psychosocial
	demands of illness, treatment and late-effects.
Anxiety-	Exploring fears and worries about the further course of the child's cancer by:
confrontation	• naming specific situations in which FoP is perceived
(individual)	• analyzing triggers, behavior and course of the perceived FoP
Resource-	Activating resources by:
activation	• drawing a biographical timeline/ the course of the disease
(individual)	• reflecting helpful things in crisis or positive lifetime periods
	• compiling helpful coping skills
Training	Creating a family shared perspective and applicating coping skills by:
(family dyad)	• sharing FoP situations and helpful coping skills in the family dyad
	• training concrete situations the family has probably to cope with
