# Supplementary material for: Effects of an intervention for fear of progression in childhood cancer patients and their parents: results of a randomized clinical trial
Source: Research Square preprint supplement (doi:10.21203/rs.3.rs-4501631/v2), 2024-08-15
Supplement: Supplementary file 4 [file fa21f673b19a9410db4b2c46.xlsx]

## Sheet: Tabelle1
Table 1: Soziodemographic and illness characteristics of the sample
Children			Intervention group (n=16)	Control group (n=13)	All (n=29)
	Age in years M (SD)		8.49 (5.47)	7.94 (3.76)	8.25 (4.74)
	Gender n (%)
		male	11 (68.75%)	8 (61.54%)	19 (65.52%)
		female	5 (31.25%)	5 (38.46%)	10 (34.48%)
		divers	-	-	-
	Diagnosis n (%)
		Leukaemia	2 (12.5%)	8 (53.33%)	10 (34.48%)
		Tumour of the central nervous system	3 (18.75%)	1 (6.67%)	4 (13.79%)
		Lymphoma	1 (6.25%)	-	1 (3.44%)
		Tumours of peripheral nerves	-	1 (6.67%)	1 (3.44%)
		Soft-tissue sarkoma	3 (18.75%)	-	3 (10.34%)
		Kidney Tumour	3 (18.75%)	2 (13.33%)	5 (17.24%)
		Bone Tumour	-	1 (6.67%)	1 (3.44%)
		Other (e.g. dysgerminoma)	4 (25.00%)	-	4 (13.797%)
	Time since diagnosis in years M (SD)		2.00 (2.29)	2.97 (2.86)	2.42 (2.55)
	Treatment n (%) - mulitiple responses possible
		Chemotherapy	13 (81.25%)	12 (80%)	25 (86.21%)
		Radiotherapy	3 (18.75%)	2 (13.33%)	5 (17.24%)
		Surgical measures	10 (62.5%)	8 (53.33%)	18 (62.07%)
		Bone narrow/stem cell transplant	-	1 (6.67%)	1 (3.344)
		Other (e.g. immune therapy)	2 (12.5%)	1 (6.67%)	3 (10.34%)
Participating children			n=5	n=1	n=6
	Age in years M (SD)		12.45 (2.71)		12.45 (2.71)
	Gender n (%)
		male	3 (60%)	1 (100%)	4 (66.67%)
		female	2 (40%)	-	2 (33.33%)
		divers	-	-	-
	Diagnosis n (%)
		Leukaemia	-	-	-
		Tumour of the central nervous system	1 (20%)	1 (100%)	2 (33.33%)
		Lymphoma	1 (20%)	-	1 (16.67%)
		Tumours of peripheral nerves	-	-	-
		Soft-tissue sarkoma	1 (20%)	-	1 (16.67%)
		Kidney Tumour	1 (20%)	-	1 (16.67%)
		Bone Tumour	-	-	-
		Other (e.g. dysgerminoma)	1 (20%)	-	1 (16.67%)
	Time since diagnosis in years M (SD)		1.94 (2.68)		1.94 (2.68)
	Treatment n (%) - mulitiple responses possible
		Chemotherapy	4 (80%)	-	4 (66.67%)
		Radiotherapy	-	1 (100%)	1 (16.67%)
		Surgical measures	3 (60%)	1 (100%)	4 (66.67%)
		Bone narrow/stem cell transplant	-	-	-
		Other (e.g. immune therapy)	1 (20%)	-	1 (16.67%)
Participating parents			n=18	n=14	n=32
	Age in years M (SD)		37.89 (5.17)	40.43 (6.54)	39 (5.85)
	Gender n (%)
		male	3 (16.67%)	2 (14.29%)	5 (15.63%)
		female	15 (83.33%)	12 (85.71%	27 (84.38%)
		divers	-	-	-
